# Supplementary material for: Prothrombotic state in patients with stable COPD: an observational study
Source: PubMed Central journal article supplement — ERJ Open Res. 2021 Nov 1;7(4):00297-2021. doi: 10.1183/23120541.00297-2021 (PMC8558471; doi:10.1183/23120541.00297-2021), 2021-11-01
Supplement: 00297-2021.SUPPLEMENT.pdf [file 00297-2021.SUPPLEMENT.pdf]

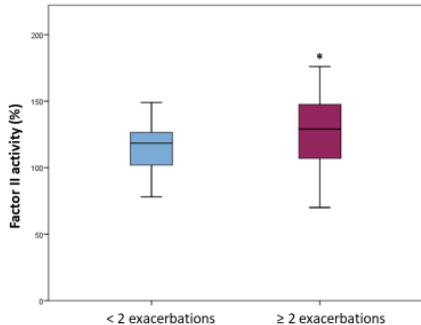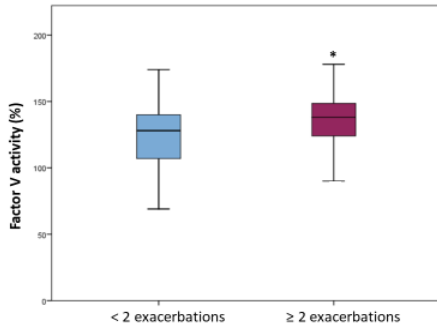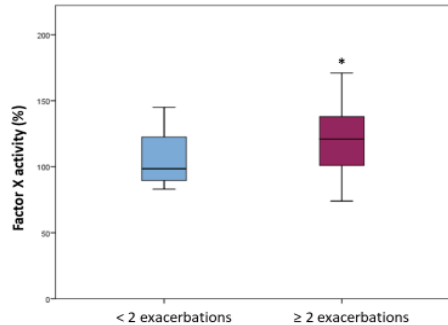

ONLINE SUPPLEMENTARY FIGURE S1

Levels of coagulation factors II, V, and X in patients with stable COPD according to exacerbation history. Boxplots display median with interquartile range and whiskers show minimum and maximum values (\* $P < 0.05$ , Mann-Whitney test). Exacerbations < 2,  $n = 78$ ; Exacerbations  $\geq 2$ ,  $n = 25$ .
